# Unspecific expression in limited excitatory cell populations in interneuron-targeting Cre-driver lines can have large functional effects

1 **Daniel Müller-Komorowska<sup>1,2</sup>, Thoralf Opitz<sup>1</sup>, Shehabeldin Elzoheiry<sup>3</sup>, Michaela**  
2 **Schweizer<sup>4</sup>, Heinz Beck<sup>1\*</sup>**

3 <sup>1</sup> Institute for Experimental Epileptology and Cognition Research, University of Bonn

4 <sup>2</sup> International Max Planck Research School for Brain and Behavior, University of Bonn

5 <sup>3</sup> Institute of Physiology and Pathophysiology, University Heidelberg

6 <sup>4</sup> Department of Electron Microscopy, Center of Molecular Neurobiology, University Medical  
7 Center Hamburg-Eppendorf, Hamburg, Germany

8 **\* Correspondence:**

9 Prof. Dr. Heinz Beck

10 [Heinz.Beck@ukbonn.de](mailto:Heinz.Beck@ukbonn.de)

11 **Keywords: Cre mouse line, cell-type specificity, optogenetics, interneuron, somatostatin,**  
12 **hippocampus, CA3**

13

14

## 15 **1 Abstract**

16 Transgenic Cre-recombinase expressing mouse lines are widely used to express fluorescent proteins  
17 and opto-/chemogenetic actuators, making them a cornerstone of modern neuroscience. Particularly,  
18 the investigation of interneurons has benefitted from the ability to target genetic constructs to defined  
19 cell types. However, the cell type specificity of some mouse lines has been called into questions. Here  
20 we show for the first time the functional consequences of unspecific expression in a somatostatin-Cre  
21 (SST-Cre) mouse line. We find large optogenetically evoked excitatory currents originating from  
22 unspecifically targeted CA3 pyramidal cells. We also used public Allen Brain Institute data to estimate  
23 expression specificity in other Cre lines. Another SST-Cre mouse lines shows comparable  
24 unspecificity, whereas a Parvalbumin-Cre mouse line shows much less unspecific expression. Finally,  
25 we make suggestions to ensure that the results from in-vivo use of Cre mouse lines are interpretable.

## 26 **2 Introduction**

27 Transgenic Cre-recombinase expressing mouse lines are widely used in modern neuroscience to  
28 specifically direct the expression of fluorescent proteins or opto- and chemogenetic actuators to  
29 neuronal subtypes. Accordingly, they are a key element of most neuronal perturbation studies. Cre  
30 driver mouse lines have been extensively used to examine the function of interneuron subtypes in-vitro  
31 and in-vivo, with increasing numbers of Cre mouse lines for specific molecular markers of different  
32 interneuron subtypes (Taniguchi et al., 2011). Very commonly used are mice expressing Cre in subsets  
33 of GABAergic interneurons under the parvalbumin (PV) or somatostatin (SST) promoters. Those lines  
34 have allowed to target two main categories of interneurons. In the hippocampus, PV<sup>+</sup> cells include fast  
35 spiking basket cells, axo-axonic cells, and interneuron types targeting proximal dendrites of pyramidal  
36 cells. SST<sup>+</sup> cells, on the other hand, are regularly spiking and inhibit pyramidal cells at their distal  
37 dendrites (Lovett-Barron et al., 2012; Pelkey et al., 2017).

38 Commonly used Cre-lines have been widely assumed to be specific, with Cre-expression confined to  
39 the cells of interest. However, this assumption has been called into question in some cases. For  
40 example, in the widely used somatostatin-IRES-Cre line (Taniguchi et al., 2011), a population of 5%  
41 of Cre-reporter positive cells were found to be fast-spiking PV<sup>+</sup> cells (Hu, Cavendish, & Agmon, 2013;  
42 Mikulovic, Restrepo, Hilscher, Kullander, & Leão, 2015). In the hippocampal CA1 subfield, this  
43 mouse line also targets a small (6%) population of fast-spiking interneurons (Hu et al., 2013; Mikulovic  
44 et al., 2015). Particularly opto- and chemogenetic studies often depend on highly specific expression  
45 patterns to disseminate the function of neuronal subtypes. Even though these findings are worrisome,  
46 one defense of such mouse lines is that the absolute number of unspecifically targeted cells is small.  
47 One could therefore assume that the observed in-vitro and in-vivo effects are dominated by the  
48 interneuron type in question.

49 Here we show that in SST-Cre mice (Savanthrapadian et al., 2014), recombination is not only induced  
50 in GABAergic interneuron types. In addition, recombination also occurs in a small subset of excitatory  
51 neurons largely confined to the CA3 pyramidal cell layer. Moreover, we find powerful functional  
52 effects of optogenetic activation that are not only contaminated by unspecifically expressing  
53 glutamatergic cells but are completely lacking any interneuron contribution. Finally, we were also  
54 unable to find anatomical or functional differences between unspecifically targeted cells and canonical  
55 CA3 pyramidal cells. This suggests that these cells are not a specific subtype of CA3 pyramidal cell.  
56 Further control experiments should be carried out in a region-specific manner, prior to the use of Cre-  
57 lines for the investigation of circuit function in behavior.

## 58 **3 Methods**

### 59 **3.1 Transgenic Animals**

60 All animal experiments were carried out according to the guidelines stated in Directive 2010/63/EU of  
61 the European Parliament on the protection of animals used for scientific purposes and were approved  
62 by authorities in Nordrhein-Westfalen (Landesamt für Natur, Umwelt und Verbraucherschutz  
63 Nordrhein Westfalen (LANUV), AZ 84-02.04.2014.A254).

64 The SST-Cre mouse line was kindly provided to us by Marlene Bartos and was described previously  
65 (Savanthrapadian et al., 2014). It was also used in a more recent study (Eyre & Bartos, 2019). Animals  
66 were bred hemizygous and were genotyped for Cre recombinase using the forward primer  
67 CCATCTGCCACCAGCCAG and the reverse primer TCGCCATCTTCCAGCAGG. Animals with an  
68 amplified fragment at 281bp were classified as transgenic. For the cross-breeding experiments (**Figure**  
69 **1C**) we used the Ai14 reporter line (Jackson Laboratories Stock No 007914).

### 70 **3.2 Stereotaxic intracranial viral injections**

71 Animals were anesthetized with a ketamine/rompun or a fentanyl/midazolam/medetomidin mixture i.p.  
72 Animals also received ketoprofen analgesia (5 mg/kg, 0.1 ml/10 g body weight) before the surgery and  
73 daily 2 days after the surgery. Viral particles (250 nl at a rate of 100 nl/min) were injected into  
74 CA3/hilus of the right hemisphere at the following coordinates relative to bregma: 2.3 mm posterior;  
75 1.6 mm lateral; 2.5 mm ventral. We used rAAV-Ef1a-DIO-hChR2(H134R)-EYFP-WPRE-pA  
76 (Received as a gift from Karl Deisseroth, Addgene plasmid # 20298 ; <http://n2t.net/addgene:20298> ;  
77 RRID:Addgene\_20298) for Cre-mediated opsin expression, AAV1/2-Ef1a-DIO-Syp-miniSOG-t2A-  
78 mCherry-WPRE-hpA (Received as a gift from Roger Tsien; Shu et al., 2011) for electron microscopy  
79 experiments and AAV1/2.Syn-hChR2(H134R)-EYFP (Received as a gift from Karl Deisseroth,  
80 Addgene plasmid # 26973 ; <http://n2t.net/addgene:26973> ; RRID:Addgene\_26973) for general  
81 expression. Cholera Toxin subunit B (CT-B), Alexa Fluor 555 conjugate (C-34775, Thermo Fischer)  
82 was injected into CA1 at bregma coordinates: 1.9 mm posterior; 1.5mm lateral; 1.7 ventral. Mice were  
83 used for electrophysiological experiments 4 to 5 weeks after viral injection.

### 84 **3.3 Somatostatin immunostaining**

85 Animals were transcardially perfused with 4% PFA and the brains were post-fixed with 4% PFA  
86 overnight at 4°C. The brains were washed in PBS the next day and slices of the dorsal hippocampus  
87 were cut on a vibratome (HM 650V; Thermo Scientific) at 50µm. After washing, slices were left in a  
88 blocking solution, consisting of 3% BSA in 0.25% PBS-T, for 2h at room temperature (RT). Then the  
89 primary antibody, rabbit anti-SST (T-4102, Peninsula Laboratories International), was applied 1:500  
90 in blocking solution overnight shaking at 4°C. The following day slices were left at RT for 30 minutes  
91 and washed in blocking solution. The secondary antibody, donkey anti-rabbit IgG, Alexa fluor 647  
92 (ab150075, Abcam), was applied 1:500 overnight shaking at 4°C. Finally, slices were washed, stained  
93 with 1:1000 DAPI for 30min at RT shaking and mounted with aqua-polymount. The SST staining for  
94 the cholera toxin-B (CT-B) injected animals followed a slightly different protocol where slices were  
95 blocked with 5% donkey serum instead of BSA and the secondary antibody was donkey anti-rabbit  
96 IgG FITC 1:500 (ab6798, Abcam). Colocalization was quantified manually from 40x images.

97

98

### 99 3.4 In-vitro electrophysiology

100 Adult mice were anesthetized with isoflurane, rapidly decapitated and the dissected brains were  
101 transferred to ice cold, carbogenated artificial cerebrospinal fluid with sucrose (ACSF; in mM: NaCl,  
102 60; sucrose, 100; KCL, 2.5; NaH<sub>2</sub>PO<sub>4</sub>, 1.25; NaHCO<sub>3</sub>, 26; CaCl<sub>2</sub>, 1; MgCl<sub>2</sub>, 5; glucose, 20; from  
103 Sigma-Aldrich) and sliced to 300µm. Slices were then transferred to ACSF at 37°C and left for 20  
104 minutes. They were then transferred to carbogenated ACSF without sucrose (NaCl, 125; KCL, 3.5;  
105 NaH<sub>2</sub>PO<sub>4</sub>, 1.25, NaHCO<sub>3</sub>, 26; CaCl<sub>2</sub>, 2; MgCl<sub>2</sub>, 2; glucose, 20; from Sigma-Aldrich) and were used  
106 for experiments after at least one hour. All experiments were performed in the same ACSF without  
107 sucrose at RT. The intracellular solution for voltage clamp experiments contained in mM: Cs  
108 methanesulfonate, 120; MgCl<sub>2</sub>, 0.5; 2-(4-(2-Hydroxyethyl)-1-piperazinyl)-ethansulfonsäure (HEPES),  
109 5; Ethylenglycol-bis(aminoethylether)-N,N,N',N'-tetraessigsäure (EGTA), 5; Adenosine 5'-  
110 triphosphate disodium salt (Na<sub>2</sub>-ATP), 5; N-(2,6-Dimethylphenylcarbamoylmethyl)triethylammonium  
111 chloride (QX 314 Cl<sup>-</sup>), 5; from Sigma Aldrich. For pharmacology we furthermore used 10µM gabazine  
112 (SR 95531 hydrobromide; Tocris), 1µM tetrodotoxin (TTX, Tocris), 200µM 4-aminopyridine (4-AP,  
113 Sigma Aldrich), 50µM 6-Cyano-7-nitroquinoxaline-2,3-dione disodium salt (CNQX, Tocris), 200µM  
114 D-(-)-2-Amino-5-phosphonopentanoic acid (D-AP5, Tocris). All these compounds were applied in the  
115 recording chamber for at least 10 minutes before continuing measurements. Most were applied for 20  
116 minutes.

117 Patch clamp experiments were performed with an Axopatch 200B and digitized on a Digidata 1322A  
118 or Digidata 1550B plus HumSilencer (Molecular Devices). Light stimulation was performed with an  
119 Omicron Luxx 473nm laser attached to a light fiber submerged in the ACSF. Light stimuli were 5ms  
120 long unless otherwise stated.

121 For the conductance analysis we assumed a chloride reversal potential of -80mV (-78.9mV calculated  
122 with Nernst equation) and a cation reversal potential of 0mV. The excitatory conductance was  
123 calculated from a current trace measured at a holding voltage near the chloride reversal with gabazine  
124 washed-in, to ensure pure excitatory response. To isolate the inhibitory conductance, we subtracted the  
125 pure excitatory response at a depolarized holding voltage from the mixed response in normal ACSF.

126 In **Figure 2C** we only included cells that showed complete block by TTX wash-in. We excluded one  
127 cell that did not show complete block, which is likely due to a wash-in failure.

### 128 3.5 Electron microscopy with miniSOG photooxidation

129 SST-Cre animals were virally transduced with EF1a-DIO-Syp-miniSOG-T2A-mCherry. Three weeks  
130 later, mice were transcidentally perfused with Ringer solution followed by 4% formaldehyde in 0.15 M  
131 cacodylate-buffer. Brains were removed and post-fixed overnight at 4°C. Coronal slices (100µm) were  
132 taken on a vibratome and slices with distinct mCherry fluorescence were chosen. Slices were fixed  
133 with 2% Glutaraldehyde for 30 min, washed with ice-cold cacodylate-buffer, and blocked for 20 min  
134 in solution containing 20mM glycine, 10mM KCN, and 20mM aminotriazoline in cacodylate-buffer.  
135 For photooxidation, slices were immersed in freshly prepared and filtered (0.22µm) 3,3'-  
136 diaminobenzidine (DAB) solution (1mg/ml DAB in 0.1 M cacodylate-Buffer, pH 7.4) that was aerated  
137 with oxygen. The miniSOG was activated with green light (FITC filterset: EX470/40, DM510, BA520)  
138 applied through a LUMPlanFl 60x NA 0.90 W at an inverted Olympus microscope equipped with a  
139 100 W HBO-Lamp. Light was applied for 20 min and fresh DAB solution was exchanged after 10 min.  
140 After illumination, slices were stored in cacodylate-buffer for further processing.

141 After photoconversion the converted region containing DAB reaction product in the hippocampus was  
 142 documented and images were taken at a Zeiss Axiophot light microscope. Thereafter the sections were  
 143 rinsed three times in 0.1 M sodium cacodylate buffer (pH 7.2-7.4) (Sigma-Aldrich, Germany) and  
 144 incubated with 1 % osmium tetroxide (Science Services, Germany) in cacodylate buffer for 20 minutes  
 145 on ice. The osmication of sections was followed by dehydration through ascending ethyl alcohol  
 146 concentration steps and rinsing twice in propylene oxide (Carl Roth, Germany). Infiltration of the  
 147 embedding medium was performed by immersing the sections first in a mixture of 2:1 of propylene  
 148 oxide and Epon (Carl Roth, Germany) then in a 1:1 mixture and finally in neat Epon and polymerised  
 149 at 60°C for 48 hours. The region of interest was dissected and Ultrathin sections (60 nm) were prepared  
 150 with a Leica Ultracut UC7. Images were taken using an EM902 transmission electron microscope  
 151 (Zeiss, Germany) equipped with a CCD in lens 2K digital camera and running the ImageSP software  
 152 (Tröndle, Moorenweis, Germany).

### 153 3.6 Quantification and Statistical Analysis

154 We used python with matplotlib (Hunter, 2007) and GraphPad Prism for plotting. Electrophysiological  
 155 data were analysed manually in Clampfit (Molecular Devices) or with python and numpy (van der  
 156 Walt, Colbert, & Varoquaux, 2011). To load .abf files into python we used the python-neo package  
 157 (Garcia et al., 2014). GraphPad Prism was used for statistical analysis. We used the t-test to compare  
 158 2 groups and two-way ANOVA to compare two groups across multiple conditions.

159 For quantification of Allen Brain Institute data (Oh et al., 2014), we used the Allen Software  
 160 Development Kit to download .jpg images. tdTomato positive cells were segmented by maximum  
 161 entropy thresholding, erosion, dilation and the particle counter in ImageJ (Schindelin et al., 2012).  
 162 Colocalization with fluorescent in-situ hybridization probe was assessed manually. In total we  
 163 quantified 23 images of dorsal hippocampus from 4 experiments (Table 1). A detailed technical  
 164 description can be found in the Transgenic Characterization whitepaper: [http://help.brain-](http://help.brain-map.org/display/mouseconnectivity/Documentation)  
 165 [map.org/display/mouseconnectivity/Documentation](http://help.brain-map.org/display/mouseconnectivity/Documentation)

| Line           | Experiment | Img ID    |           |           |           |           |           |
|----------------|------------|-----------|-----------|-----------|-----------|-----------|-----------|
| SST-IRES-Cre   | 182530118  | 182530130 | 182530134 | 182530136 | 182530140 | 182530142 | 182530156 |
|                | 167643437  | 167643500 | 167643502 | 167643504 | 167643514 | 167643516 |           |
| Pvalb-IRES-Cre | 81657984   | 81636703  | 81636705  | 81636709  | 81636711  | 81636713  | 81636715  |
|                | 111192541  | 111192610 | 111192612 | 111192625 | 111192627 | 111192629 |           |

166 Table 1: Experiments and images from the Allen Brain Institute used for the quantification in **Figure**  
 167 **5**. All images can be found here: <http://connectivity.brain-map.org/transgenic>

168

## 169 4 Results

### 170 4.1 The SST-Cre line is not specific for SST<sup>+</sup> interneurons in CA3

171 SST positive interneurons in CA3 are located predominantly in stratum oriens (SO) and stratum  
172 radiatum (SR). SST positive cells have a characteristic dendrite morphology, with most of the dendritic  
173 arbor confined to the same sublayer as the soma (Freund & Buzsáki, 1996). We expressed a construct  
174 that leads to Cre-dependent expression of EYFP in the CA3 region of heterozygous SST-Cre mice  
175 using rAAV-dependent gene transfer. We found EYFP expression in cells of the pyramidal cell layer  
176 (PCL; **Figure 1A**). In stratum oriens and stratum radiatum, cells also expressed EYFP but the signal  
177 there was almost dominated by the neuropil. EYFP<sup>+</sup> cells in the PCL showed features typical for CA3  
178 pyramidal cells (**Figure 1B**) such as thorny excrescences on apical dendrites.

179 To determine if these EYFP<sup>+</sup> cells are also SST<sup>+</sup>, we immunostained for SST. This revealed that EYFP  
180 expression was highly specific for SST<sup>+</sup> interneurons in SO, where 50/53 EYFP<sup>+</sup> cells expressed SST.  
181 Similarly, in SR 9/10 EYFP<sup>+</sup> cells expressed SST. In marked contrast we found that a minority of  
182 EYFP<sup>+</sup> cells in the pyramidal cell layer of CA3 coexpressed SST (21/147 cells, **Figure 1D,E**). In  
183 addition to viral gene transfer of a reporter construct, we also crossed mice of our SST-Cre line with a  
184 tdTomato reporter mouse (line Ai14, see methods). As in the previous experiment, we found that most  
185 reporter positive cells were in the PCL and showed pyramidal like dendritic morphology in CA3, CA2  
186 and CA1. Interestingly, we also found a very small number of granule cell-like neurons in the granule  
187 cell layer of the dentate gyrus (**Figure 1C**) that were not observed in virally transduced animals.

188 These results show that Cre recombinase is not only targeted to SST<sup>+</sup> interneurons in the hippocampus.  
189 It is also expressed in pyramidal-like neurons within the pyramidal cell layer that are devoid of  
190 detectable somatostatin levels. In marked contrast, the SST-Cre mouse line showed high local  
191 specificity in CA3 SO, SR and the hilus of the dentate gyrus.

### 192 4.2 Commissural projections make direct excitatory connections in contralateral CA1

193 Does a relatively small number of CA3 neurons targeted in SST-Cre mice have a measurable functional  
194 impact on neuronal networks? CA3 pyramidal neurons are known to make extensive long-range  
195 connections to the contralateral hippocampus (Buzsáki & Czéh, 1981; Buzsáki & Eidelberg, 1982;  
196 Finnerty & Jefferys, 1993) and the septum (Risold & Swanson, 1997). We therefore examined if the  
197 small number of CA3 neurons targeted in SST-Cre mice is sufficient to generate detectable  
198 contralateral projections. Unilateral rAAV injection in the CA3 region of SST-Cre mice led to a strong  
199 axonal EYFP signal in the contralateral hippocampus (**Figure 2A**) and the septum (**Figure 2B**). The  
200 axon distribution was as described for CA3 pyramidal cells, with EYFP-expressing axons mainly in  
201 SO and SR of both the CA1 and CA3 regions.

202 Contralateral projections have been described not only for CA3 pyramidal neurons, but also for  
203 inhibitory hippocampal interneurons including SST-expressing subtypes (Eyre & Bartos, 2019;  
204 Zappone & Sloviter, 2001). We therefore went on to further characterize the functional properties of  
205 contralaterally projecting axons, with the goal to assess i) if they correspond to excitatory projections  
206 arising from CA3 pyramidal neurons and ii) if they are sufficiently numerous to cause significant  
207 physiological effects. To this end, we obtained patch-clamp recordings from CA1 pyramidal neurons  
208 in mice expressing hChR2 in the contralateral CA3 region in SST-Cre mice. This allowed us to  
209 perform light-based stimulation of contralaterally projecting axons while recording from CA1  
210 pyramidal neurons. To separate excitatory from inhibitory neurotransmission, we voltage clamped  
211 CA1 neurons to different holding voltages. Currents at -80 or -70 mV were evoked close to the chloride

212 reversal potential and are therefore dominated by excitatory postsynaptic currents (EPSCs), whereas  
213 currents evoked at 0 or -10 mV are dominated by inhibitory postsynaptic currents (IPSCs). In all CA1  
214 pyramidal neurons, blue light illumination reliably evoked both excitatory and inhibitory currents  
215 (**Figure 2C,D,E**). To ascertain which of these components are monosynaptic in nature, we applied the  
216 Na<sup>+</sup> channel blocker tetrodotoxin (TTX, 1μM), which invariably blocked synaptic transmission  
217 completely. Coapplying TTX with 4-aminopyridine (4-AP, 200μM) enables direct light-based  
218 transmitter release from terminals expressing ChR2, and thus indicates monosynaptic connections.  
219 Coapplication of 4-AP recovered EPSCs, but not IPSCs (**Figure 2C**; EPSCs 217%, IPSCs 1% of  
220 baseline). The recovery of EPSCs but not IPSCs indicates that contralateral projections in SST-Cre  
221 mice are excitatory. Additionally, these results indicate that the light-evoked IPSCs are due to  
222 polysynaptic recruitment of interneurons. This idea is supported by the temporal delay between  
223 excitatory and inhibitory conductances (**Figure 3G**). Consistent with polysynaptic recruitment of  
224 inhibitory interneurons, light-evoked IPSCs were abrogated by blocking glutamatergic transmission  
225 with CNQX (50μM) and D-AP5 (200μM; **Figure 2D**; EPSCs 29%, IPSCs 8% of baseline). Finally,  
226 we show that – as expected – light-evoked IPSCs were sensitive to the GABA-A blocker gabazine  
227 (10μM; **Figure 2E**; EPSCs 114%, IPSCs 14% of baseline).

228 Taken together, we found no evidence for direct commissural inhibition from SST<sup>+</sup> interneurons from  
229 CA3 to CA1. Instead, direct excitatory transmission recruited strong polysynaptic inhibition.

### 230 **4.3 Unconditionally transduced and SST-Cre fibers are functionally indistinguishable in** 231 **Contralateral CA1**

232 To investigate if this is consistent with the canonical CA3 to CA1 commissural projection, we induced  
233 broad expression of ChR2 in all CA3 cell types using viral gene transfer of an unconditional construct  
234 leading to expression of EYFP-hChR2. Light based manipulations should be dominated by activity of  
235 pyramidal cells, since they vastly outnumber other neuronal subtypes. Virus injection resulted in strong  
236 fluorescence signal in CA1, CA3 and DG that was dominated by fiber signal at the injection site  
237 (**Figure 3A**). Contralateral to the injection site, we found prominent labelling of axons in CA1 and C3  
238 in both SR and SO as well as the inner molecular layer of the DG. The DG fiber pattern was consistent  
239 with the commissural mossy cell projection and the fiber patterns in CA1 and CA3 with the  
240 commissural CA3 projection. We again assessed the monosynaptic transmission onto contralateral  
241 CA1 pyramidal cells using combined application of TTX and 4-AP (1μM, 200μM) and found that it  
242 completely inhibited IPSCs (**Figure 3C**; EPSCs 88%, IPSCs 4% of baseline). Next, we asked if there  
243 are quantitative differences between the SST-Cre fibers and the unconditionally transduced fibers. We  
244 converted the pharmacologically isolated currents (**Figure 2E**) to conductances (**Figure 3D**) according  
245 to holding and reversal potentials (see Methods). Because the density of EYFP-hChR2 positive fibers  
246 is much larger in the unconditional case, the absolute conductances cannot be compared meaningfully.  
247 However, because the inhibition is polysynaptic, it is expected to scale to some extent with the  
248 excitation. Therefore, the ratio between excitation and inhibition can give insights into differential  
249 recruitment in the micronetwork.

250 We found that in the SST-Cre line, the inhibitory conductance was stronger than the excitatory one  
251 (**Figure 3D,E**). Comparing the SST-Cre line with the unconditional case, we did not detect a difference  
252 between the ratios of maximum inhibition and excitation (**Figure 3F**). In both cases, the amplitude of  
253 inhibition was larger than that of excitation for different strengths of light-based stimulation.  
254 Furthermore, the latencies between the onset of excitation and inhibition showed no significant  
255 difference (**Figure 3H**) and were consistent with values found in CA3 to CA1 Schaffer collateral  
256 projections (Scanziani, 2001). However, the latencies between the peak of the excitatory conductance

257 and the inhibitory conductance showed a significant interaction between laser output and the type of  
258 expression. Main effects were not significant (**Figure 3G**, Greenhouse-Geisser corrected 2-way  
259 ANOVA).

#### 260 **4.4 Commissural CA3 fibers make synaptic contacts on spines and originate primarily from** 261 **PCL cells**

262 To further confirm that contralateral projections are excitatory, we used miniSOG photooxidation to  
263 generate electron-dense labelling in contralateral CA1 SO localized to fibers with Cre recombinase  
264 activity in the SST-Cre line (**Figure 4**). Of 70 miniSOG positive structures, 40 clearly were presynaptic  
265 boutons making postsynaptic contacts. All 40 structures made contact on a spine, 4 of them made  
266 contact on 2 spines (**Figure 4A**). Serial imaging sections of 25 boutons showed that 22 of them  
267 unambiguously made contact on spines (**Figure 4B**). The other three boutons were not entirely  
268 sectioned. The types of most synaptic contacts could not be defined clearly because of the electron  
269 dense labelling in the pre-synapse. However, the postsynaptic densities that are clearly in the imaging  
270 plane appear asymmetric. Together with the fact that they all contact spines, this data suggest that the  
271 direct contacts are predominantly excitatory, and we found no evidence for direct inhibitory contacts  
272 in CA1 SO.

273 Next, we used retrograde tracing in CA1 with CT-B to determine which cell types project to  
274 contralateral CA1 (**Figure 4C**). We found that virtually all projecting cells were in the CA3 pyramidal  
275 cell layer. With the SST staining we identified 81 cells, none of which was CT-B positive. This data  
276 suggests that somatostatin interneurons are not part of the commissural projection.

277 Finally, we tried to relate our findings to other commonly used Cre mouse lines. Therefore, we used  
278 data from the Allen Brain Institute to estimate specificity in two other interneuron targeting Cre lines.

#### 279 **4.5 Unspecificity is comparable in another SST-Cre mouse line**

280 The mouse line we describe here has not been widely used. The SST-IRES-Cre line (Taniguchi et al.,  
281 2011) is much more wide-spread, with 203 publications relating to it according to Jackson Laboratories  
282 (as of 11.10.2019). To relate our findings to the SST-IRES-Cre line we used the Allen Brain Institute's  
283 transgenic characterization data of the mouse connectome project (Oh et al., 2014). We used two  
284 experiments in which the SST-IRES-Cre mouse line was crossed with a tdTomato expressing reporter  
285 line (Ai-14) and fluorescent in-situ hybridization (FISH) was performed for SST.

286 We found that the SST-IRES-Cre mouse line is similarly unspecific in CA3, with only 48/127 (37.8%)  
287 tdTomato<sup>+</sup> cells being SST-mRNA<sup>+</sup> in the PCL, 82/100 (82%) in SO and 61/74 (82.4%) in SR (**Figure**  
288 **5B,C**). The CA1 area also contained some SST- cells in the PCL but appeared overall more specific  
289 with 29/51 (56.9%) tdTomato<sup>+</sup> cells being SST-mRNA positive, 281/299 (94%) in SO and 20/24  
290 (83.3%) in SR (**Figure 5D,E**). The total amount of cells located in PCL is much smaller in the SST-  
291 IRES-Cre line (**Figure 5A**) than the SST-Cre line when crossed with the Ai14 reporter line (**Figure**  
292 **1C**).

293 We also quantified colocalization of Cre-induced recombination with PV expression in the Pvalb-  
294 IRES-Cre mouse line (Hippenmeyer et al., 2005). We found that this mouse line was much more  
295 specific than both SST-Cre mouse lines in both the CA3 and CA1 regions (**Figure 5F-J**; CA3: 45/46,  
296 97.8% SO; 112/112, 100% PCL; 26/26, 100% SR. CA1: 170/191, 89% SO; 284/294, 96.6% PCL;  
297 29/34, 85.3% SR). In summary, the problems we described are common to at least one other commonly  
298 used SST-Cre line, but less severe in another mouse line used to study interneurons.



299 **5 Discussion**

300 We show for the first time that CA3 PCs that are unspecifically targeted in an SST-Cre mouse line  
301 make functional connections indistinguishable from those of canonical CA3 PCs. While the specificity  
302 of SST-Cre lines has been questioned before, the functional relevance of unspecific expression of Cre-  
303 recombinase was unknown. Estimating the potential effects of unspecific expression is essential for  
304 neuronal perturbation studies that seek to isolate the function of specific cell-types. Our data suggest  
305 that studies that perturb SST cells in CA3 with the two examined SST-Cre lines would be massively  
306 confounded by Cre recombinase expression in CA3 pyramidal cells.

307 **5.1 How relevant are these findings for other Cre mouse lines?**

308 We demonstrate wide-spread physiological effects of unspecific Cre-expression in only one mouse  
309 line, but have identified unspecific expression in another, widely used mouse line following  
310 quantitative analysis of Allen Brain Atlas data. Indeed, specificity issues with an SST-Cre mouse line  
311 were raised previously (Taniguchi et al., 2011). Moreover, a further study has found targeting of a large  
312 number (31%) of slow-spiking cells in the CA1 PCL, also consistent with unspecific expression  
313 (Mikulovic et al., 2015). It is worth noting that the mouse line we used was generated by the same  
314 method as most modern Cre mouse lines, the BAC technology. Specificity can vary widely between  
315 Cre lines and brain areas, as our comparison of the SST-IRES-Cre and the Pvalb-IRES-Cre lines shows.  
316 Therefore, specificity should not be generalized lightly to other Cre mouse lines or even to other brain  
317 areas in the same mouse line. We suggest that pending careful quantitative analysis in all the subregions  
318 under investigation in the specific study, caution is warranted in assuming specificity.

319 **5.2 Do SST-expressing interneurons make contralateral connections?**

320 Despite the specificity issues, the SST-Cre mouse line clearly targets SST<sup>+</sup> INs in CA3. We found no  
321 evidence for direct inhibition from those cells onto contralateral CA1 PCs in our patch clamp  
322 experiments. Even the unconditionally transduced slices did not reveal monosynaptic inhibition,  
323 despite targeting all inhibitory cell types. Furthermore, our anatomical EM data showed no evidence  
324 for inhibitory synapses in contralateral CA1 SO. The CT-B data did not reveal cells outside CA3 PCL  
325 projecting to contralateral CA1. This leads us to the conclusion that an inhibitory CA3 to contralateral  
326 CA1 connection is nonexistent or extremely weak and SST<sup>+</sup> interneurons do not contribute to it.

327 Although we focused on CA3 and CA1, we noted very sparse fiber signal in the outer molecular layer  
328 of DG in the SST-Cre line. This is in line with previous anatomical evidence showing a commissural  
329 projection with a GABAergic component (Deller, Nitsch, & Frotscher, 1995; Zappone & Sloviter,  
330 2001). However, using in-vivo patch clamp and optogenetics we did not find evidence for a functional  
331 connection onto granule cells (data not shown).

332 Recently, Eyre & Bartos (2019) found commissural DG fibers in a GAD2-Cre and the SST-Cre mouse  
333 line we used in our study. They performed whole-cell patch clamp in contralateral GCs and found no  
334 evidence for a functional connection, in line with our findings. However, they also report commissural  
335 fibers from CA3 to CA1 in both mouse lines. Our findings suggest that the contralateral CA1 fiber  
336 signal originates from CA3 pyramidal cells, rather than SST INs. Furthermore, our findings do not  
337 explain the CA1 fiber labeling in the GAD2-Cre line, but they suggest that the functional aspect of this  
338 inhibitory connection is weak. It remains to be shown which inhibitory cell type, if any, is responsible  
339 for this contralateral fiber signal.

340

### 341 **5.3 Utility of mouse lines with unspecific principal cell expression for in-vivo experiments**

342 A common use of Cre lines is circuit perturbation during behavioral tasks. Principal cell connections  
343 can span wide areas of the brain and must be accounted for when studying interneurons. When light is  
344 delivered to the brain through light fibers, it can travel considerable distances. Therefore, light  
345 delivered to areas where transgene expression is specific, could affect unspecifically expressing cells  
346 and fibers in faraway areas. Notably, such effects cannot be excluded with a commonly used control  
347 group expressing only GFP (or another fluorophore) instead of a light sensitive opsin. The same applies  
348 to a larger extent to chemogenetic experiments, where the agonist might be delivered systemically,  
349 rather than locally.

350 To ensure that principal cell expression does not confound a behavioral experiment, the colocalization  
351 between transgene expressing cells and the appropriate interneuron marker should be quantified for all  
352 areas where viral transduction occurred. This includes the injection cannula tract. When the transgene  
353 is expressed by crossing mouse lines, the expressing fiber distribution throughout the entire brain  
354 should be examined carefully. Especially for optogenetic experiments, it would be valuable to  
355 additionally check for direct excitatory synaptic transmission. For a specific mouse line, no direct  
356 excitatory currents should be detectable. Importantly, the net effect of a direct excitatory connection  
357 can be reduced spiking through recruitment of feedforward and feedback inhibition (Buzsáki & Czéh,  
358 1981). Therefore, it is not sufficient to quantify spiking or activity levels in the post-synaptic population  
359 to exclude direct excitation. These issues should be taken into account when using any Cre-mouse line  
360 for in-vivo behavioral experiments, particularly the SST-Cre mouse lines used in the present study.

## 361 **6 Acknowledgement**

362 We acknowledge the support of the Microscopy Core facility of the University Bonn Medical Center,  
363 specifically Hannes Beckert, and the Viral Core Facility, specifically Susanne Schoch-McGovern. We  
364 thank Joanna Komorowska-Müller for helpful suggestions on the antibody staining protocol and figure  
365 design. We also thank Kristina Piwellek for excellent technical assistance with viral injections for  
366 miniSOG labeling.

## 367 **7 Funding**

368 The study was supported by SFB 1089 and the SPP 2041 of the Deutsche Forschungsgemeinschaft to  
369 HB.

## 370 **8 Data Availability Statement**

371 Datasets are available on request. The raw data supporting the conclusions of this manuscript will be  
372 made available by the authors, without undue reservation, to any qualified researcher.

## 373 **9 Conflict of Interest**

374 The authors declare that the research was conducted in the absence of any commercial or financial  
375 relationships that could be construed as a potential conflict of interest.

## 376 **10 Author Contributions**

377 DMK and HB designed the project and wrote the manuscript. DMK performed viral injections, SST  
378 antibody stainings, patch clamp recordings and quantification of Allen Brain Institute Data. TO

379 performed viral injections for miniSOG and performed photooxidation. MS acquired EM images and  
380 quantified them. SE performed CT-B injections and SST antibody stainings in connection with them.

## 381 **11 References**

382 Buzsáki, G., & Czéh, G. (1981). Commissural and Perforant Path Interactions in the Rat Hippocampus. *Exp Brain*  
383 *Res*, *43*, 429–438.

384 Buzsáki, G., & Eidelberg, E. (1982). Convergence of associational and commissural pathways on CA1 pyramidal  
385 cells of the rat hippocampus. *Brain Research*, *237*(2), 283–295. Retrieved from  
386 <http://www.ncbi.nlm.nih.gov/pubmed/7082996>

387 Deller, T., Nitsch, R., & Frotscher, M. (1995). Phaseolus vulgaris-Leucoagglutinin Dentate Gyrus: Evidence for a  
388 Previously Unknown Commissural Projection to the Outer Molecular Layer. *The Journal of Comparative*  
389 *Neurology*, *68*, 55–68.

390 Eyre, M. D., & Bartos, M. (2019). Somatostatin-Expressing Interneurons Form Axonal Projections to the  
391 Contralateral Hippocampus. *Frontiers in Neural Circuits*, *13*, 1–15.  
392 <https://doi.org/10.3389/fncir.2019.00056>

393 Finnerty, G. T., & Jefferys, J. G. R. (1993). Functional connectivity from ca3 to the ipsilateral and contralateral  
394 ca1 in the rat dorsal hippocampus. *Neuroscience*, *56*(1), 101–108. [https://doi.org/10.1016/0306-  
395 \*4522\(93\)90566-X\*](https://doi.org/10.1016/0306-4522(93)90566-X)

396 Freund, T. F., & Buzsáki, G. (1996). Interneurons of the hippocampus. *Hippocampus*, *6*(4), 347–470.  
397 [https://doi.org/10.1002/\(SICI\)1098-1063\(1996\)6:4<347::AID-HIPO1>3.0.CO;2-I](https://doi.org/10.1002/(SICI)1098-1063(1996)6:4<347::AID-HIPO1>3.0.CO;2-I)

398 Garcia, S., Guarino, D., Jaillet, F., Jennings, T., Pröpper, R., Rautenberg, P. L., ... Davison, A. P. (2014). Neo: an  
399 object model for handling electrophysiology data in multiple formats. *Frontiers in Neuroinformatics*, *8*,  
400 1–10. <https://doi.org/10.3389/fninf.2014.00010>

401 Hippenmeyer, S., Vrieseling, E., Sigrist, M., Portmann, T., Laengle, C., Ladle, D. R., & Arber, S. (2005). A  
402 developmental switch in the response of DRG neurons to ETS transcription factor signaling. *PLoS Biology*,  
403 *3*(5), 0878–0890. <https://doi.org/10.1371/journal.pbio.0030159>

404 Hu, H., Cavendish, J. Z., & Agmon, A. (2013). Not all that glitters is gold: off-target recombination in the  
405 somatostatin-IRES-Cre mouse line labels a subset of fast-spiking interneurons. *Frontiers in Neural*  
406 *Circuits*, *7*, 1–4. <https://doi.org/10.3389/fncir.2013.00195>

407 Hunter, J. D. (2007). Matplotlib: A 2D Graphics Environment. *Computing in Science & Engineering*, *9*(3), 90–95.  
408 <https://doi.org/10.1109/MCSE.2007.55>

409 Lovett-Barron, M., Turi, G. F., Kaifosh, P., Lee, P. H., Bolze, F., Sun, X.-H., ... Losonczy, A. (2012). Regulation of  
410 neuronal input transformations by tunable dendritic inhibition. *Nature Neuroscience*, *15*(3), 423–430, S1-  
411 3. <https://doi.org/10.1038/nn.3024>

412 Mikulovic, S., Restrepo, C. E., Hilscher, M. M., Kullander, K., & Leão, R. N. (2015). Novel markers for OLM  
413 interneurons in the hippocampus. *Frontiers in Cellular Neuroscience*, *9*, 201.  
414 <https://doi.org/10.3389/fncel.2015.00201>

415 Oh, S. W., Harris, J. A., Ng, L., Winslow, B., Cain, N., Mihalas, S., ... Zeng, H. (2014). A mesoscale connectome of

416 the mouse brain. *Nature*, 508(7495), 207–214. <https://doi.org/10.1038/nature13186>

417 Pelkey, K. A., Chittajallu, R., Craig, M. T., Tricoire, L., Wester, J. C., & McBain, C. J. (2017). Hippocampal  
418 GABAergic Inhibitory Interneurons. *Physiological Reviews*, 97(4), 1619–1747.  
419 <https://doi.org/10.1152/physrev.00007.2017>

420 Risold, P. ., & Swanson, L. . (1997). Connections of the rat lateral septal complex. *Brain Research Reviews*, 24(2–  
421 3), 115–195. [https://doi.org/10.1016/S0165-0173\(97\)00009-X](https://doi.org/10.1016/S0165-0173(97)00009-X)

422 Savanthrapadian, S., Meyer, T., Elgueta, C., Booker, S. A., Vida, I., & Bartos, M. (2014). Synaptic properties of  
423 SOM- and CCK-expressing cells in dentate gyrus interneuron networks. *The Journal of Neuroscience*,  
424 34(24), 8197–8209. <https://doi.org/10.1523/JNEUROSCI.5433-13.2014>

425 Scanziani, F. P. and M. (2001). Enforcement of temporal fidelity in pyramidal cells by somatic feed-forward  
426 inhibition. *Science*, 293(5532), 1159–1163. <https://doi.org/10.1126/science.1060342>

427 Schindelin, J., Arganda-Carreras, I., Frise, E., Kaynig, V., Longair, M., Pietzsch, T., ... Cardona, A. (2012). Fiji: an  
428 open-source platform for biological-image analysis. *Nature Methods*, 9(7), 676–682.  
429 <https://doi.org/10.1038/nmeth.2019>

430 Shu, X., Lev-Ram, V., Deerinck, T. J., Qi, Y., Ramko, E. B., Davidson, M. W., ... Tsien, R. Y. (2011). A genetically  
431 encoded tag for correlated light and electron microscopy of intact cells, tissues, and organisms. *PLoS*  
432 *Biology*, 9(4). <https://doi.org/10.1371/journal.pbio.1001041>

433 Taniguchi, H., He, M., Wu, P., Kim, S., Paik, R., Sugino, K., ... Huang, Z. J. (2011). A Resource of Cre Driver Lines  
434 for Genetic Targeting of GABAergic Neurons in Cerebral Cortex. *Neuron*, 71(6), 995–1013.  
435 <https://doi.org/10.1016/j.neuron.2011.07.026>

436 van der Walt, S., Colbert, S. C., & Varoquaux, G. (2011). The NumPy Array: A Structure for Efficient Numerical  
437 Computation. *Computing in Science & Engineering*, 13(2), 22–30. <https://doi.org/10.1109/MCSE.2011.37>

438 Zappone, C. A., & Sloviter, R. S. (2001). Commissurally projecting inhibitory interneurons of the rat  
439 hippocampal dentate gyrus: A colocalization study of neuronal markers and the retrograde tracer Fluoro-  
440 Gold. *Journal of Comparative Neurology*, 441(4), 324–344. <https://doi.org/10.1002/cne.1415>

441

442

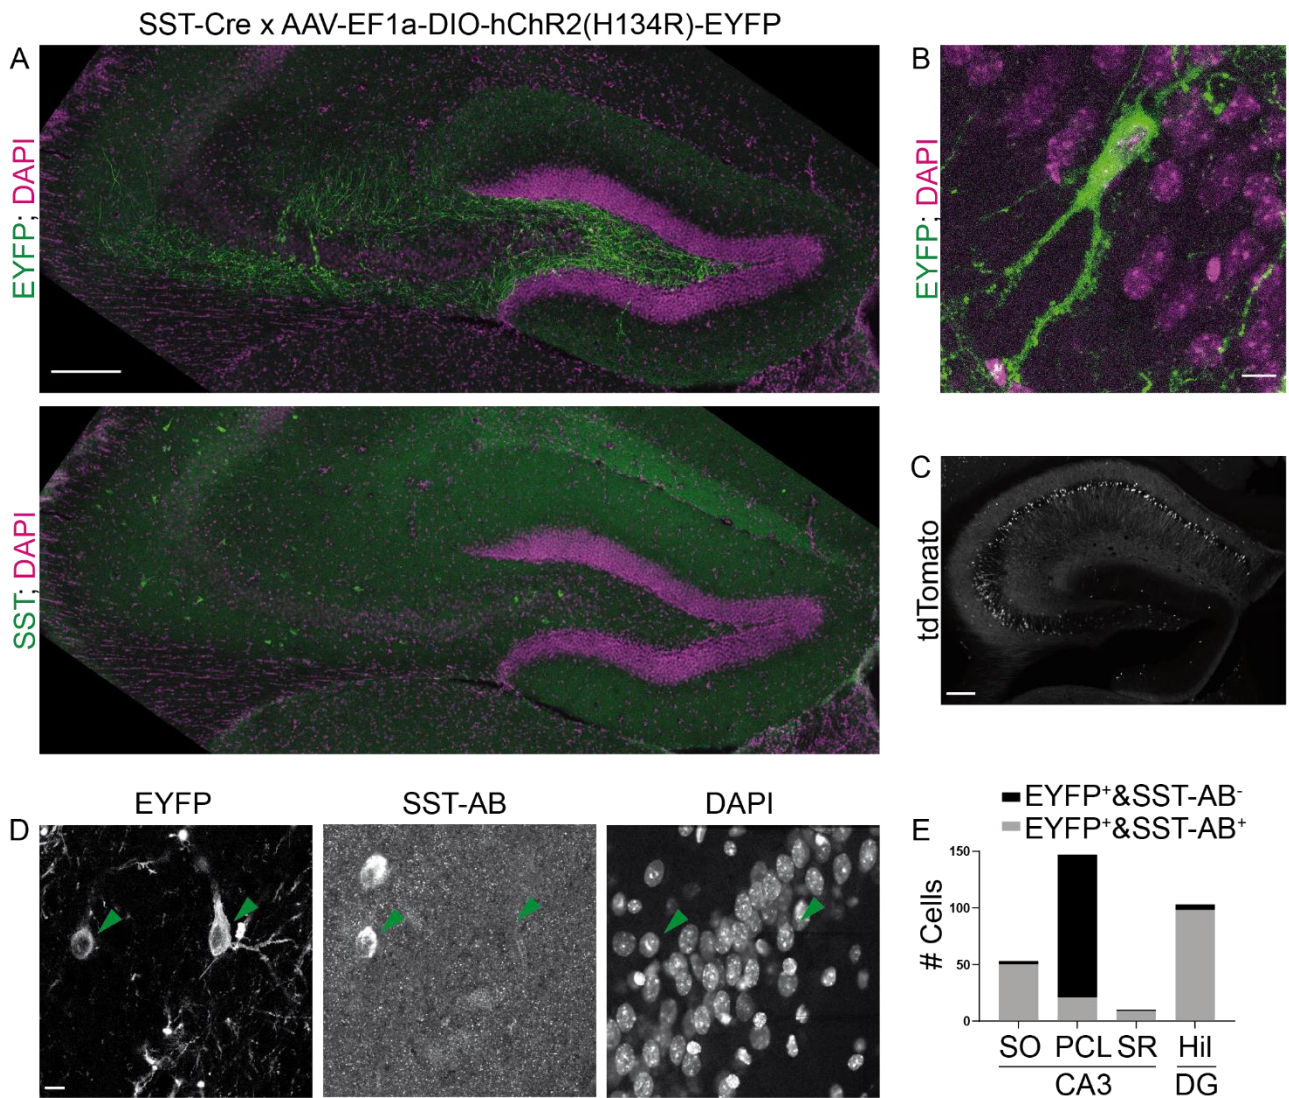

443  
 444 **Figure 1: The SST-Cre line is not specific for SST<sup>+</sup> interneurons in CA3.** A) CA3 and the hilus of  
 445 the dentate gyrus were virally transduced by intracranial stereotactic injection with a Cre dependent,  
 446 EYFP expressing construct. Lower Image shows SST staining in the same slice. 10x objective.  
 447 Scalebar 200 $\mu$ m. Contrast adjusted for visualization. B) EYFP positive cell in CA3 PCL and two apical  
 448 dendrites in stratum lucidum. Scalebar 10 $\mu$ m. C) Hippocampal tdTomato signal in the SST-Cre mouse  
 449 line crossed with at tdTomato reporter line. 10x magnification. Scalebar 200 $\mu$ m. D) Example images  
 450 showing 2 EYFP<sup>+</sup> cells, one in SO and one in the PCL. The cell in SO is also SST positive, the cell in  
 451 the PCL is SST negative. 40x magnification. Scalebar 10 $\mu$ m. E) Quantification of SST colocalization  
 452 for 40x images.

453

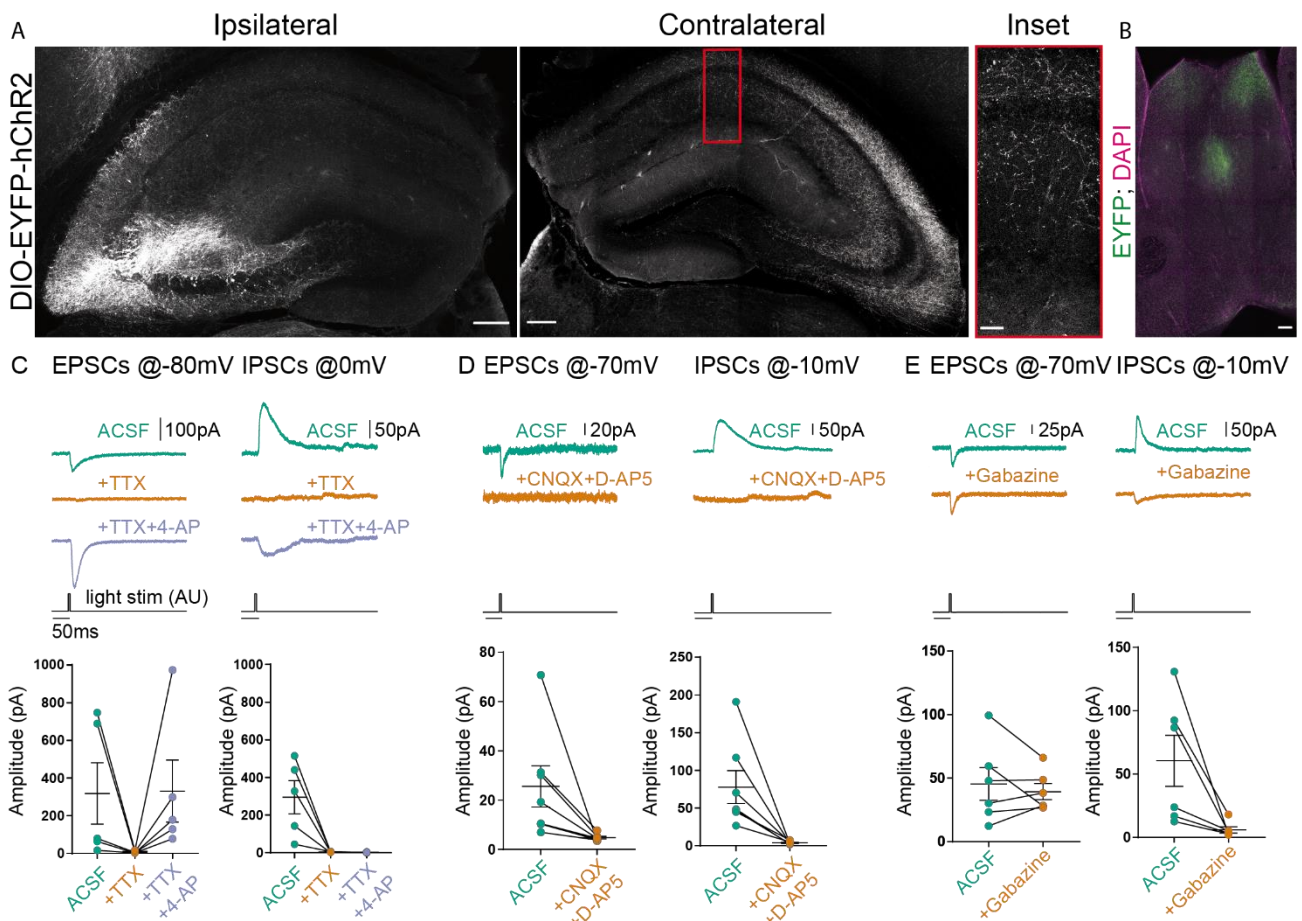

454  
 455 **Figure 2: Stimulation of contralateral projections of CA4 neurons in the SST-Cre mouse line.** A)  
 456 Confocal images from post-fixed acute slices of the ipsilateral injection site (left) and the contralateral  
 457 hippocampus (right). The inset shows fluorescent fiber signal in the contralateral hemisphere.  
 458 Scalebars: 200 $\mu$ m. Inset: 100 $\mu$ m. B) Slice showing the projection from CA3 to the septum in the SST-  
 459 Cre line. Scalebar 100 $\mu$ m. C), D), E) EPSCs and IPSCs measured in contralateral CA1 pyramidal cells.  
 460 Light stimulus is 5ms long with 26mW total light-fiber output. C) Application of TTX alone abolished  
 461 both excitatory and inhibitory currents. However, co-application of TTX+4-AP recovered EPSCs but  
 462 not IPSCs (except in one cell). Ratio t-test of dependent samples between ACSF and +TTX+4-AP one-  
 463 tailed: EPSCs,  $p = 0.1412$ ,  $t=1.241$ ,  $df=4$ ; IPSCs,  $p < 0.0001$ ,  $t=13.18$ ,  $df =4$ . D) Application of  
 464 CNQX+D-AP5 abolishes both EPSCs and IPSCs. Ratio t-test of dependent samples one-tailed: EPSCs,  
 465  $p=0.0017$ ,  $t=4.681$ ,  $df=6$ ; IPSCs,  $p<0.0001$ ,  $t=8.082$ ,  $df=6$ . E) Application of Gabazine does not affect  
 466 EPSCs but inhibits IPSCs. Ratio t-test of dependent samples one-tailed: EPSCs,  $p= 0.48186$ ,  
 467  $t=0.04799$ ,  $df=5$ ; IPSCs,  $p = 0.0021$ ,  $t=4.947$ ,  $df=5$ . All Responses were recorded at 26mW fiber output.

468



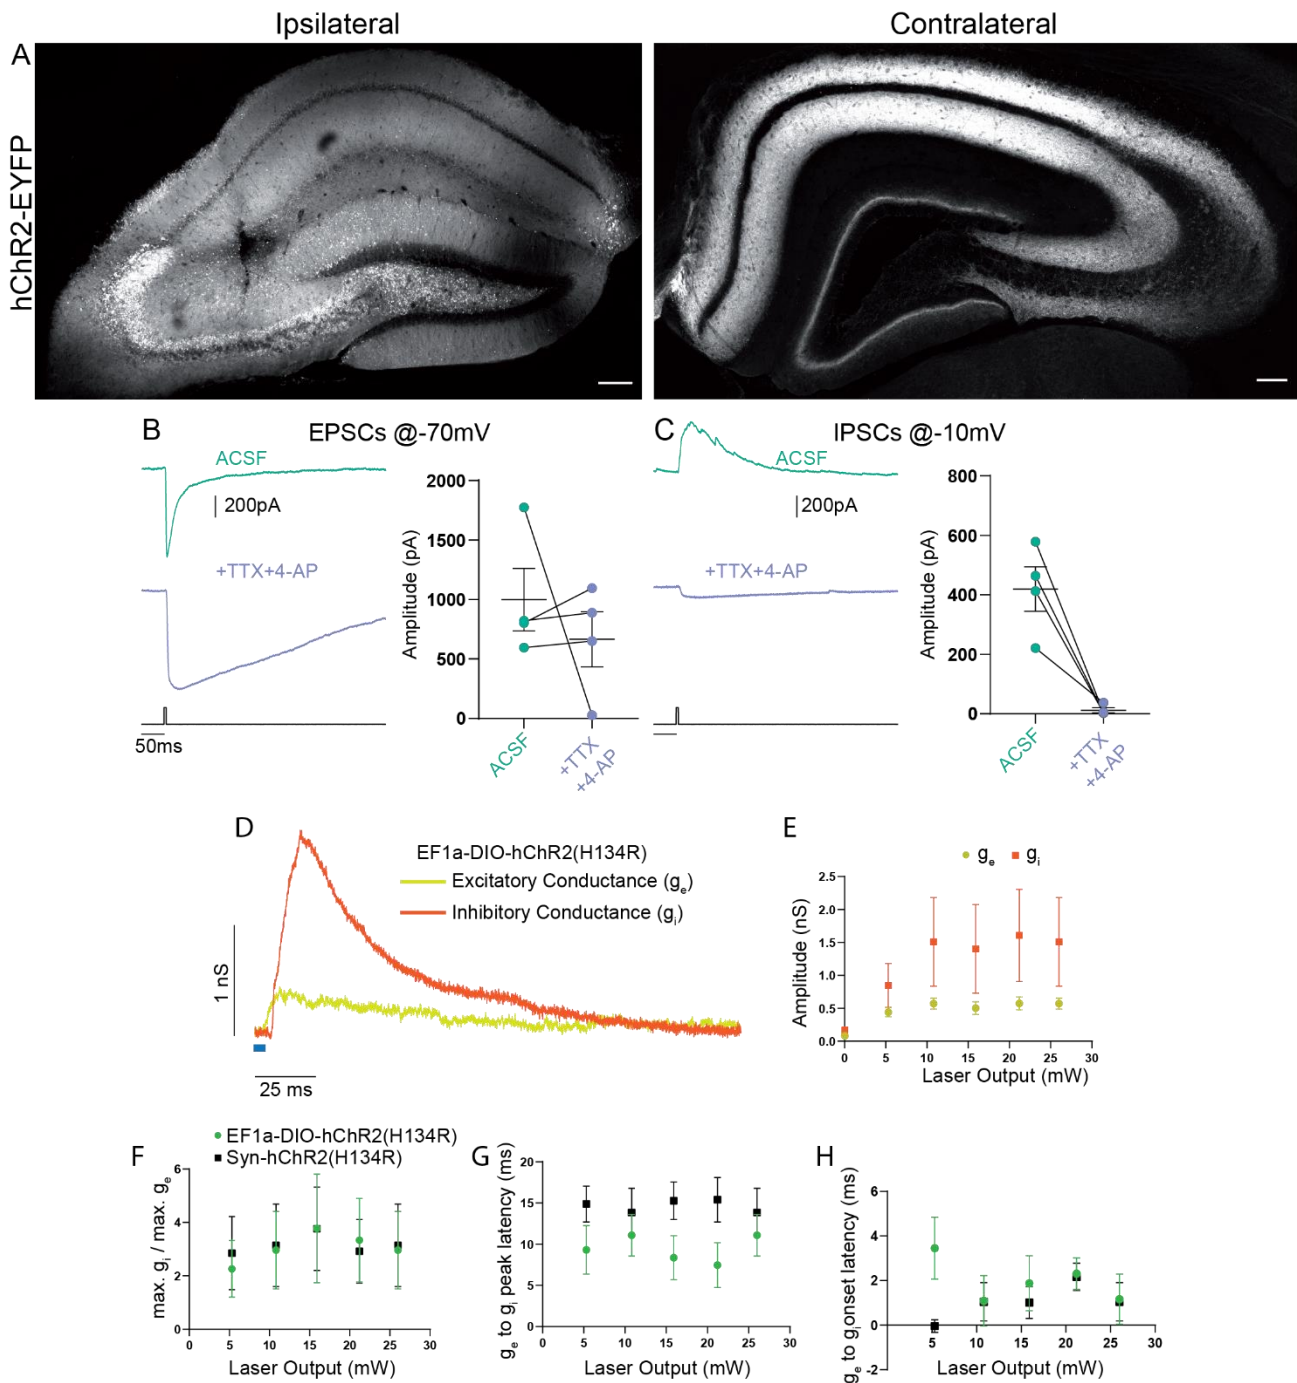

469

470 **Figure 3: Contralateral projections originating from Cre-expressing cells in CA3 vs the general**  
 471 **CA3 neuron population are functionally indistinguishable.** A) Confocal images from post-fixed  
 472 acute slices of the ipsilateral injection site (left) and the contralateral hippocampus (right).  
 473 Unconditional viral expression. B) EPSCs and C) IPSCs (right) before and after bath application of  
 474 TTX and 4-AP measured in contralateral CA1 pyramidal cells. 5ms light stimulation at 26mW fiber  
 475 output. Ratio t-test of dependent samples one-tailed: EPSCs,  $p=0,2284$ ,  $t=0,8519$ ,  $df=3$ ; IPSCs,  $p=$   
 476  $0,0069$ ,  $t=5,200$ ,  $df=3$ . D) Example from conductance analysis of fibers in the SST-Cre mouse line,  
 477 conditionally expressing. 26mW light fiber output and 5 ms light stimulation. Excitatory conductance  
 478 was calculated from gabazine traces. Inhibitory conductance was calculated from gabazine subtracted  
 479 traces. E) Quantification of excitatory and inhibitory peak conductance at different laser powers. 2-

480 way ANOVA Greenhouse-Geisser corrected: Main effects, Laser Output:  $p=0.0422$ ,  $DF = 5$ ,  $F(1.182,$   
481  $7.091) = 5.849$ , Conductance Type.:  $p=0.2189$ ,  $DF=1$ ,  $F(1.000, 6.000)=1.885$ . Interaction:  $p=0.2527$ ,  
482  $DF=5$ ,  $F(1.115, 6.693)=1.600$ . F) Quantification of conductance ratios (inhibitory peak conductance  
483 divided by excitatory peak conductance) for conditional viral expression (EF1a-DIO-hChR2(H134R))  
484 and unconditional expression (Syn-hChR2(H134R)). 2-way ANOVA Greenhouse-Geisser corrected:  
485 Main effects, Laser Output:  $p=0.1406$ ,  $DF = 4$ ,  $F(1.393, 15.33)=2.341$ , Expression Type:  $p=0.9614$ ,  
486  $DF=1$ ,  $F(1, 11)=0.002455$ . Interaction:  $p=0.7974$ ,  $DF=4$ ,  $F(4, 44)=0.4143$ . G) Quantification of latency  
487 between excitatory peak conductance and inhibitory peak conductance. 2-way ANOVA Greenhouse-  
488 Geisser corrected: Main effects: Laser Output:  $p=0.6446$ ,  $DF=4$ ,  $F(1.720, 18.92)= 0.4014$ , Expression  
489 Type:  $p=0.1766$ ,  $DF=1$ ,  $F(1, 11)=2.085$ . Interaction:  $p=0.0320$ ,  $DF=4$ ,  $F(4, 44)=2.912$ . H)  
490 Quantification of latency between excitatory conductance onset and inhibitory conductance onset. 2-  
491 way ANOVA Greenhouse-Geisser corrected: Main effects, Laser Output:  $p=0.6474$ ,  $DF=4$ ,  $F(2.306,$   
492  $25.37)=0.4853$ , Expression Type:  $p=0.1759$ ,  $DF=1$ ,  $F(1,11)=2.092$ . Interaction:  $p=0.3588$ ,  $DF=4$ ,  
493  $F(4,44)=1.121$ .

494



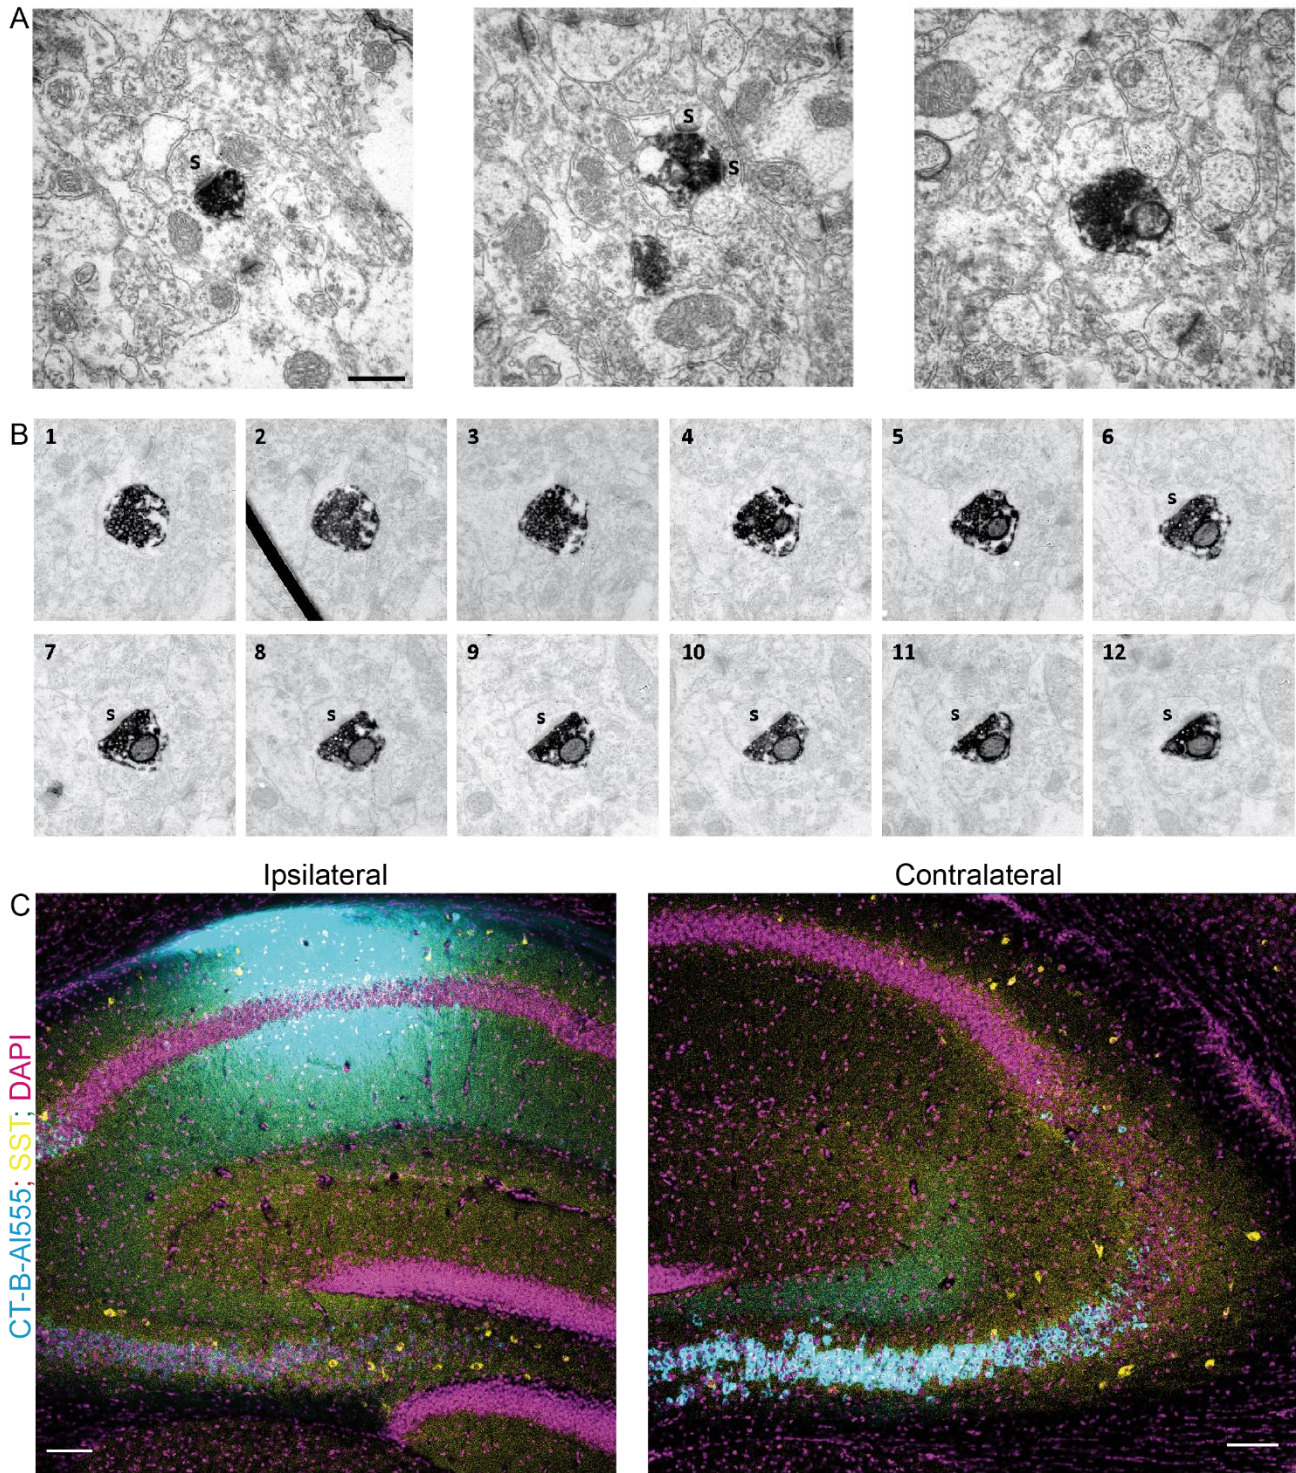

495

496 **Figure 4: Contralaterally projecting axons originating from Cre-expressing neurons in CA3 are**  
 497 **excitatory.** A) miniSOG positive electron dense structure making presynaptic contact on one spine  
 498 (left) two spines (middle) and no identifiable contact (right). Scalebar 500nm. B) Serial scan of a  
 499 miniSOG positive electron dense structure. Post synaptic spine is first identifiable in slice 6. C)   
 500 Cholera toxin-B tracing in CA1. Ipsilateral injection of CT-B subunit in CA1. Contralateral,  
 501 retrogradely traced cells (cyan) and SST immunoreactive cells (yellow). Scalebar 200µm.

502



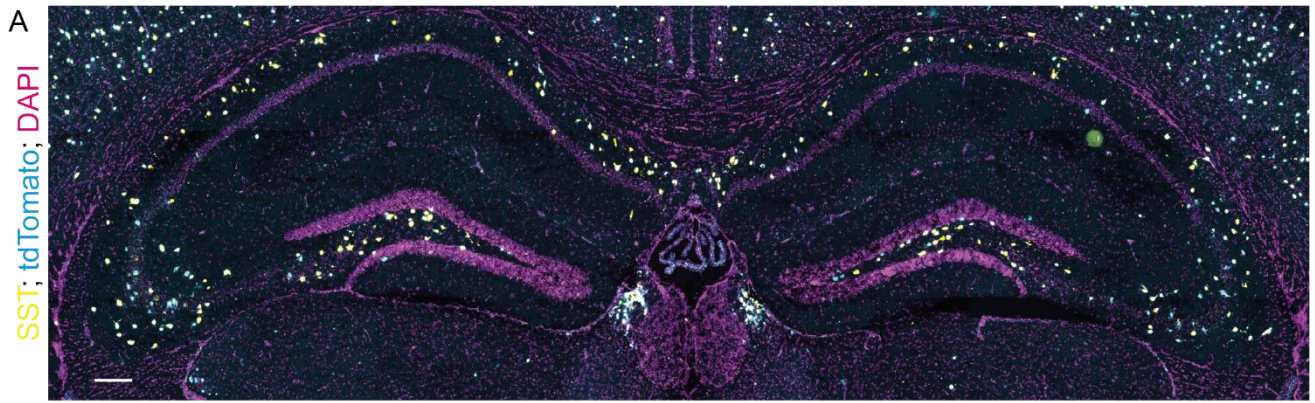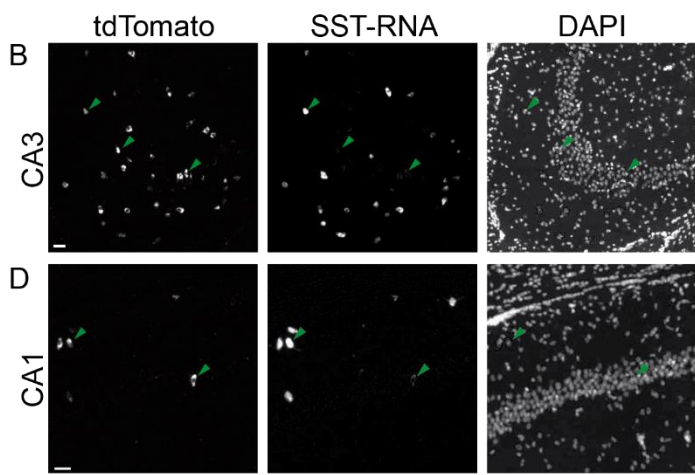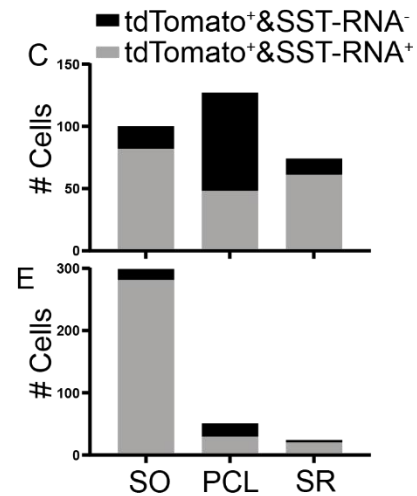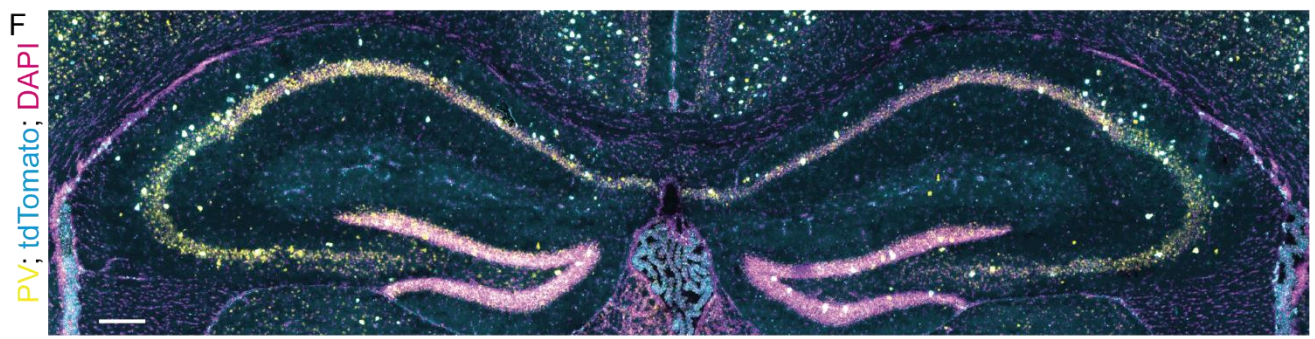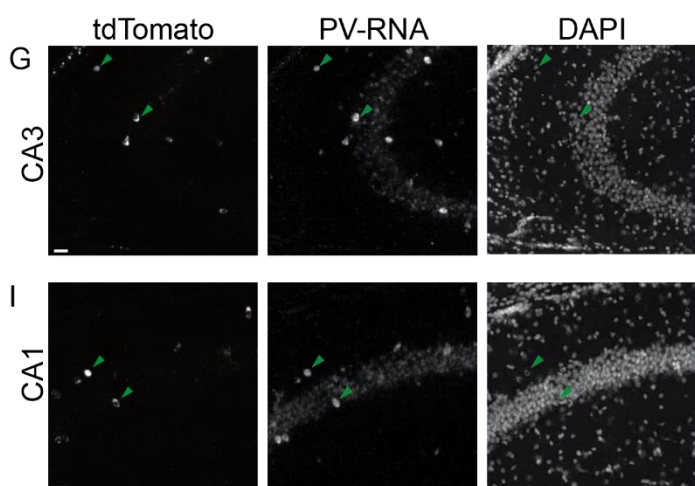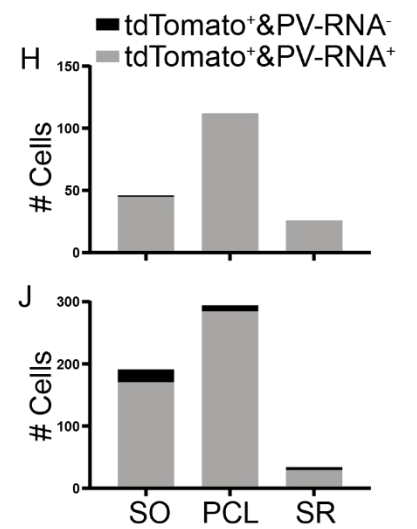

504 **Figure 5: Analysis of Cre lines.** Images from the Allen Brain Institute. Cre mouse lines were crossed  
505 with the tdTomato reporter line Ai14. A) Experiment 167643437, image ID 167643516. Contrast auto  
506 adjusted and lookup tables change. B-E) Example images cropped from A), contrast unadjusted.  
507 Quantification on the right. F) Experiment 111192541, image ID 111192610. Contrast auto adjusted  
508 and lookup tables changed. G-J) Example images cropped from F) contrast unadjusted. Quantification  
509 on the right. Scalebars: 100 and 20 $\mu$ m.
